# Supplementary material for: Transcriptomic Analysis of the Differential Nephrotoxicity of Diverse Brominated Flame Retardants in Rat and Human Renal Cells
Source: MDPI journal article supplement (doi:10.3390/ijms221810044), 2021-09-17
Supplement: s1 [file s1]

**Table S1. Differentially expressed genes in HK-2 cells after BDE-47 exposure**

| Gene ID         | Gene Name  | Q value  | P value  | Log FC   |
|-----------------|------------|----------|----------|----------|
| ENSG00000268220 | AC008040.5 | 0.034637 | 0.002474 | 1.077264 |
| ENSG00000273489 | AC008264.2 | 0.000241 | 2.60E-06 | 2.568728 |
| ENSG00000269242 | AC010422.3 | 0.008163 | 0.000268 | 2.262132 |
| ENSG00000279592 | AC010653.2 | 0.00495  | 0.000134 | 1.344836 |
| ENSG00000255498 | AC068385.1 | 0.01964  | 0.001052 | 1.931164 |
| ENSG00000282033 | AC074387.1 | 0.012087 | 0.000486 | 1.071099 |
| ENSG00000220793 | AC087190.1 | 0.000282 | 3.24E-06 | 1.193149 |
| ENSG00000254665 | AC091053.1 | 0.046613 | 0.003978 | 2.27546  |
| ENSG00000271787 | AC104794.4 | 0.005169 | 0.000142 | 1.915886 |
| ENSG00000219410 | AC125494.1 | 0.047298 | 0.004076 | 1.223314 |
| ENSG00000102575 | ACP5       | 1.21E-07 | 3.10E-10 | 1.203135 |
| ENSG00000154734 | ADAMTS1    | 1.48E-08 | 2.86E-11 | -1.07425 |
| ENSG00000261641 | AL031600.3 | 0.000597 | 7.89E-06 | 1.77265  |
| ENSG00000238164 | AL139246.5 | 6.69E-09 | 1.20E-11 | 1.584169 |
| ENSG00000225339 | AL354740.1 | 0.004552 | 0.00012  | 3.63711  |
| ENSG00000284128 | AP000356.3 | 0.00012  | 1.10E-06 | 1.230886 |
| ENSG00000254873 | AP001267.1 | 0.021045 | 0.001169 | 1.948798 |
| ENSG00000130203 | APOE       | 0.036613 | 0.002701 | 1.076347 |
| ENSG00000100628 | ASB2       | 0.009019 | 0.000311 | 1.356537 |
| ENSG00000147614 | ATP6V0D2   | 0.000101 | 9.05E-07 | 1.101865 |
| ENSG00000101197 | BIRC7      | 1.61E-08 | 3.23E-11 | 1.688676 |
| ENSG00000182795 | C1orf116   | 0.000741 | 1.01E-05 | -1.00611 |
| ENSG00000074410 | CA12       | 3.19E-06 | 1.26E-08 | 1.017948 |
| ENSG00000012124 | CD22       | 2.10E-06 | 7.14E-09 | 1.016879 |
| ENSG00000138395 | CDK15      | 0.003408 | 7.88E-05 | -1.68988 |
| ENSG00000239704 | CDRT4      | 0.045028 | 0.003799 | 1.146551 |
| ENSG00000103196 | CRISPLD2   | 0.000194 | 2.04E-06 | -1.24298 |
| ENSG00000103316 | CRYM       | 0.000316 | 3.70E-06 | 1.184108 |
| ENSG00000172346 | CSDC2      | 1.17E-06 | 3.82E-09 | 1.311166 |
| ENSG00000142871 | CYR61      | 9.98E-14 | 6.91E-17 | -1.00995 |
| ENSG00000073737 | DHRS9      | 0.000322 | 3.81E-06 | 1.186376 |
| ENSG00000115380 | EFEMP1     | 0.000583 | 7.67E-06 | -1.05567 |
| ENSG00000156804 | FBXO32     | 1.34E-21 | 9.24E-26 | 1.285656 |
| ENSG00000158869 | FCER1G     | 0.048857 | 0.004267 | 1.423952 |
| ENSG00000265817 | FSBP       | 0.023236 | 0.001349 | 1.482972 |
| ENSG00000130222 | GADD45G    | 0.00879  | 0.000297 | 1.06535  |
| ENSG00000155265 | GOLGA7B    | 6.21E-06 | 2.66E-08 | 1.03965  |
| ENSG00000136235 | GPNMB      | 4.13E-14 | 2.57E-17 | 1.140957 |
| ENSG00000161835 | GRASP      | 8.47E-06 | 3.99E-08 | 1.071031 |
| ENSG00000244067 | GSTA2      | 0.000264 | 2.94E-06 | 1.740084 |
| ENSG00000242574 | HLA-DMB    | 1.51E-14 | 8.37E-18 | 1.130248 |
| ENSG00000105707 | HPN        | 0.002072 | 4.22E-05 | 1.104789 |
| ENSG00000101384 | JAG1       | 2.45E-07 | 6.49E-10 | 1.141582 |
| ENSG00000135253 | KCP        | 2.12E-08 | 4.54E-11 | 1.585708 |
| ENSG00000212724 | KRTAP2-3   | 0.000177 | 1.79E-06 | -1.18082 |
| ENSG00000187416 | LHFPL3     | 0.004214 | 0.000106 | 1.797539 |
| ENSG00000225329 | LHFPL3-AS2 | 0.005697 | 0.000164 | 1.462097 |

|                 |           |          |          |          |
|-----------------|-----------|----------|----------|----------|
| ENSG00000185186 | LINC00313 | 0.002852 | 6.24E-05 | 1.159082 |
| ENSG00000231776 | LINC01611 | 0.026084 | 0.001612 | 1.041742 |
| ENSG00000100253 | MIOX      | 2.29E-20 | 3.17E-24 | 1.495341 |
| ENSG00000067798 | NAV3      | 1.03E-06 | 3.21E-09 | -1.05255 |
| ENSG00000169418 | NPR1      | 1.28E-14 | 6.23E-18 | 1.184375 |
| ENSG00000012504 | NR1H4     | 0.005803 | 0.000171 | 1.284558 |
| ENSG00000176046 | NUPR1     | 0.000657 | 8.82E-06 | 1.558888 |
| ENSG00000004799 | PDK4      | 1.41E-05 | 8.01E-08 | 1.025633 |
| ENSG00000135549 | PKIB      | 3.67E-09 | 5.84E-12 | 1.080784 |
| ENSG00000104368 | PLAT      | 1.30E-18 | 2.70E-22 | -1.05259 |
| ENSG00000100033 | PRODH     | 6.47E-05 | 5.28E-07 | 1.183644 |
| ENSG00000102032 | RENBP     | 2.20E-05 | 1.39E-07 | 1.7467   |
| ENSG00000230207 | RPL4P5    | 0.010343 | 0.000383 | 1.051224 |
| ENSG00000135094 | SDS       | 0.000727 | 9.87E-06 | 1.268985 |
| ENSG00000138623 | SEMA7A    | 1.14E-13 | 8.71E-17 | -1.00814 |
| ENSG00000106366 | SERPINE1  | 4.08E-17 | 1.13E-20 | -1.31538 |
| ENSG00000167711 | SERPINF2  | 0.019239 | 0.001018 | 1.031799 |
| ENSG00000143554 | SLC27A3   | 8.05E-06 | 3.57E-08 | 1.192682 |
| ENSG00000095932 | SMIM24    | 1.73E-05 | 1.04E-07 | 1.107406 |
| ENSG00000188176 | SMTNL2    | 6.17E-11 | 5.94E-14 | 2.118032 |
| ENSG00000164266 | SPINK1    | 0.014351 | 0.000659 | 1.435922 |
| ENSG00000182557 | SPNS3     | 0.001979 | 3.89E-05 | 1.066972 |
| ENSG00000164744 | SUN3      | 0.042812 | 0.003448 | -1.00284 |
| ENSG00000170006 | TMEM154   | 8.12E-12 | 6.75E-15 | -1.03459 |
| ENSG00000206140 | TMEM191C  | 0.001442 | 2.56E-05 | 1.019586 |
| ENSG00000171227 | TMEM37    | 8.68E-06 | 4.20E-08 | 1.087179 |
| ENSG00000157873 | TNFRSF14  | 2.90E-16 | 1.01E-19 | 1.187668 |
| ENSG00000187688 | TRPV2     | 0.002033 | 4.09E-05 | 1.333955 |
| ENSG00000186919 | ZACN      | 0.025385 | 0.001533 | 5.091299 |
| ENSG00000178150 | ZNF114    | 8.10E-15 | 3.36E-18 | 1.358482 |

**Table S2. Differentially expressed genes in HK-2 cells after HBCD exposure**

| Gene ID         | Gene Name  | Q value  | P value  | Log FC   |
|-----------------|------------|----------|----------|----------|
| ENSG00000273489 | AC008264.2 | 0.016594 | 0.000207 | 1.989328 |
| ENSG00000270607 | AC009549.1 | 7.13E-06 | 1.04E-08 | 1.126095 |
| ENSG00000279592 | AC010653.2 | 0.026738 | 0.000413 | 1.233077 |
| ENSG00000238164 | AL139246.5 | 0.0018   | 7.13E-06 | 1.04669  |
| ENSG00000225339 | AL354740.1 | 0.020784 | 0.000286 | 3.400935 |
| ENSG00000167772 | ANGPTL4    | 0.000798 | 2.60E-06 | 1.093564 |
| ENSG00000140450 | ARRDC4     | 1.64E-07 | 1.14E-10 | -1.04822 |
| ENSG00000100628 | ASB2       | 0.006165 | 4.95E-05 | 1.525706 |
| ENSG00000147614 | ATP6V0D2   | 1.91E-09 | 6.60E-13 | 1.576584 |
| ENSG00000074410 | CA12       | 1.01E-05 | 1.54E-08 | 1.0112   |
| ENSG00000088340 | FER1L4     | 9.00E-08 | 4.98E-11 | 1.070898 |
| ENSG00000265817 | FSBP       | 0.016616 | 0.000209 | 1.711906 |
| ENSG00000128242 | GAL3ST1    | 0.004337 | 3.06E-05 | 1.180107 |
| ENSG00000130513 | GDF15      | 6.67E-06 | 9.24E-09 | 1.079559 |
| ENSG00000242574 | HLA-DMB    | 8.64E-14 | 1.20E-17 | 1.122345 |
| ENSG00000135253 | KCP        | 1.55E-05 | 2.69E-08 | 1.332589 |
| ENSG00000134545 | KLRC1      | 0.022863 | 0.000331 | 1.100211 |
| ENSG00000185186 | LINC00313  | 0.003526 | 2.12E-05 | 1.215463 |
| ENSG00000247095 | MIR210HG   | 8.07E-05 | 1.77E-07 | 1.188444 |
| ENSG00000104419 | NDRG1      | 8.64E-14 | 1.10E-17 | 1.245054 |
| ENSG00000176046 | NUPR1      | 0.007664 | 7.11E-05 | 1.38117  |
| ENSG00000188176 | SMTNL2     | 4.64E-05 | 9.64E-08 | 1.509104 |
| ENSG00000265972 | TXNIP      | 3.73E-07 | 3.36E-10 | -1.2534  |
| ENSG00000214049 | UCA1       | 0.011048 | 0.000119 | 1.053742 |
| ENSG00000178150 | ZNF114     | 3.45E-11 | 9.56E-15 | 1.203731 |

**Table S3. Differentially expressed genes in HK-2 cells after TBBPA exposure**

| Gene ID         | Gene Name  | Q value  | P value  | Log FC   |
|-----------------|------------|----------|----------|----------|
| ENSG00000235852 | AC005540.1 | 0.003676 | 0.000391 | -1.59389 |
| ENSG00000262185 | AC005736.1 | 0.000154 | 8.16E-06 | 1.24623  |
| ENSG00000262888 | AC005736.2 | 0.013894 | 0.002072 | 1.002454 |
| ENSG00000267469 | AC005944.1 | 0.040632 | 0.008639 | 1.006333 |
| ENSG00000268220 | AC008040.5 | 0.015159 | 0.002323 | 1.084926 |
| ENSG00000273489 | AC008264.2 | 0.00039  | 2.55E-05 | 2.27858  |
| ENSG00000279592 | AC010653.2 | 0.011709 | 0.001673 | 1.115757 |
| ENSG00000261777 | AC012184.3 | 0.004125 | 0.000451 | 1.048673 |
| ENSG00000266872 | AC015688.8 | 0.014869 | 0.002258 | 1.822319 |
| ENSG00000274213 | AC015912.3 | 0.006418 | 0.000782 | 1.0854   |
| ENSG00000272831 | AC027644.3 | 0.002888 | 0.000292 | 1.026608 |
| ENSG00000225205 | AC078883.1 | 2.75E-06 | 8.03E-08 | -1.79455 |
| ENSG00000279033 | AC090984.1 | 0.023633 | 0.004191 | 1.926385 |
| ENSG00000223396 | AC096677.1 | 1.90E-07 | 3.82E-09 | 1.351556 |
| ENSG00000253882 | AC099548.2 | 1.38E-06 | 3.66E-08 | -1.61925 |
| ENSG00000271787 | AC104794.4 | 0.00298  | 0.000304 | 1.818109 |
| ENSG00000261298 | AC122134.1 | 0.010831 | 0.001507 | -1.07948 |
| ENSG00000223804 | AC244669.1 | 8.77E-06 | 2.98E-07 | 1.073745 |
| ENSG00000181790 | ADGRB1     | 0.00054  | 3.69E-05 | 1.335251 |
| ENSG00000153292 | ADGRF1     | 1.30E-05 | 4.78E-07 | -1.67041 |
| ENSG00000173698 | ADGRG2     | 6.87E-06 | 2.26E-07 | -1.61686 |
| ENSG00000111863 | ADTRP      | 2.45E-07 | 5.14E-09 | 1.156573 |
| ENSG00000154027 | AK5        | 3.37E-11 | 3.19E-13 | 1.075193 |
| ENSG00000261641 | AL031600.3 | 0.013841 | 0.002061 | 1.210721 |
| ENSG00000235142 | AL080314.2 | 4.39E-06 | 1.36E-07 | -2.06142 |
| ENSG00000238164 | AL139246.5 | 0.000107 | 5.36E-06 | 1.071165 |
| ENSG00000225339 | AL354740.1 | 0.016216 | 0.002544 | 2.781692 |
| ENSG00000228748 | AL450306.1 | 0.032651 | 0.006454 | 1.166826 |
| ENSG00000229953 | AL590666.2 | 0.000322 | 2.01E-05 | 1.052138 |
| ENSG00000136010 | ALDH1L2    | 1.71E-11 | 1.52E-13 | 1.297118 |
| ENSG00000132965 | ALOX5AP    | 0.010831 | 0.001506 | 1.173334 |
| ENSG00000254873 | AP001267.1 | 0.010218 | 0.001396 | 1.916608 |
| ENSG00000109321 | AREG       | 3.09E-06 | 9.12E-08 | 1.074582 |
| ENSG00000081181 | ARG2       | 8.42E-23 | 1.34E-25 | 1.29215  |
| ENSG00000116584 | ARHGEF2    | 1.51E-21 | 2.61E-24 | 1.100003 |
| ENSG00000070669 | ASNS       | 2.10E-40 | 5.83E-44 | 1.486603 |
| ENSG00000162772 | ATF3       | 8.78E-11 | 8.69E-13 | 1.180838 |
| ENSG00000228218 | ATF4P3     | 0.007053 | 0.000876 | 1.005207 |
| ENSG00000147614 | ATP6V0D2   | 1.87E-42 | 2.59E-46 | 3.152642 |
| ENSG00000105327 | BBC3       | 8.51E-08 | 1.59E-09 | 1.185476 |
| ENSG00000133134 | BEX2       | 2.42E-29 | 1.68E-32 | 2.635529 |

|                 |            |          |          |          |
|-----------------|------------|----------|----------|----------|
| ENSG00000023445 | BIRC3      | 2.63E-17 | 9.84E-20 | -1.11152 |
| ENSG00000273145 | BX537318.1 | 0.00163  | 0.000141 | 1.021242 |
| ENSG00000273812 | BX640514.2 | 3.01E-07 | 6.56E-09 | 1.274678 |
| ENSG00000165507 | C10orf10   | 3.45E-10 | 3.74E-12 | -1.32361 |
| ENSG00000214212 | C19orf38   | 0.000569 | 3.94E-05 | 1.299919 |
| ENSG00000180044 | C3orf80    | 1.84E-07 | 3.66E-09 | 1.236065 |
| ENSG00000197405 | C5AR1      | 5.88E-12 | 4.93E-14 | 1.890318 |
| ENSG00000204387 | C6orf48    | 3.05E-14 | 1.67E-16 | 1.094357 |
| ENSG00000164746 | C7orf57    | 4.98E-10 | 5.52E-12 | 1.371477 |
| ENSG00000172137 | CALB2      | 8.33E-09 | 1.20E-10 | 1.208488 |
| ENSG00000272398 | CD24       | 1.09E-15 | 5.12E-18 | -1.39098 |
| ENSG00000166589 | CDH16      | 3.30E-05 | 1.41E-06 | -1.15571 |
| ENSG00000113361 | CDH6       | 2.60E-16 | 1.12E-18 | -1.97086 |
| ENSG00000124762 | CDKN1A     | 1.43E-18 | 4.74E-21 | 1.661858 |
| ENSG00000239704 | CDRT4      | 0.00189  | 0.000169 | 1.499596 |
| ENSG00000172216 | CEBPB      | 2.71E-07 | 5.75E-09 | 1.007701 |
| ENSG00000128965 | CHAC1      | 1.53E-19 | 4.02E-22 | 1.370771 |
| ENSG00000165376 | CLDN2      | 3.54E-19 | 1.05E-21 | -2.07261 |
| ENSG00000069493 | CLEC2D     | 4.32E-15 | 2.13E-17 | 1.332466 |
| ENSG00000143786 | CNIH3      | 9.16E-17 | 3.68E-19 | 1.463659 |
| ENSG00000128510 | CPA4       | 5.21E-09 | 7.03E-11 | -1.26461 |
| ENSG00000168993 | CPLX1      | 1.28E-05 | 4.68E-07 | 1.105486 |
| ENSG00000176092 | CRYBG2     | 5.96E-06 | 1.92E-07 | 1.224926 |
| ENSG00000150527 | CTAGE5     | 1.28E-23 | 1.60E-26 | 1.033078 |
| ENSG00000116761 | CTH        | 5.76E-69 | 3.99E-73 | 1.792338 |
| ENSG00000081041 | CXCL2      | 8.02E-08 | 1.48E-09 | 1.247454 |
| ENSG00000163734 | CXCL3      | 2.98E-05 | 1.26E-06 | 1.15543  |
| ENSG00000169429 | CXCL8      | 0.002145 | 0.000199 | 1.037395 |
| ENSG00000138061 | CYP1B1     | 0.000349 | 2.22E-05 | 1.040718 |
| ENSG00000175197 | DDIT3      | 9.42E-20 | 2.41E-22 | 1.907917 |
| ENSG00000164825 | DEFB1      | 3.53E-06 | 1.06E-07 | -1.20543 |
| ENSG00000099958 | DERL3      | 2.34E-07 | 4.88E-09 | 1.011703 |
| ENSG00000107984 | DKK1       | 9.95E-05 | 4.93E-06 | -1.38225 |
| ENSG00000262001 | DLGAP1-AS2 | 5.41E-09 | 7.45E-11 | 1.073424 |
| ENSG00000128590 | DNAJB9     | 1.28E-23 | 1.68E-26 | 1.376668 |
| ENSG00000149599 | DUSP15     | 1.23E-06 | 3.17E-08 | 1.780887 |
| ENSG00000129521 | EGLN3      | 2.05E-11 | 1.83E-13 | -1.44223 |
| ENSG00000154928 | EPHB1      | 4.97E-08 | 8.64E-10 | 1.016228 |
| ENSG00000178607 | ERN1       | 2.38E-24 | 2.63E-27 | 1.128521 |
| ENSG00000135842 | FAM129A    | 7.15E-16 | 3.22E-18 | 1.095722 |
| ENSG00000185112 | FAM43A     | 2.08E-06 | 5.79E-08 | 1.54436  |
| ENSG00000173295 | FAM86B3P   | 5.43E-05 | 2.48E-06 | 1.242144 |
| ENSG00000214050 | FBXO16     | 6.95E-06 | 2.29E-07 | 1.10716  |

|                 |             |          |          |          |
|-----------------|-------------|----------|----------|----------|
| ENSG00000161243 | FBXO27      | 1.46E-05 | 5.47E-07 | 1.001023 |
| ENSG00000158869 | FCER1G      | 0.027069 | 0.005029 | 1.400898 |
| ENSG00000272143 | FGF14-AS2   | 4.57E-05 | 2.04E-06 | 1.137791 |
| ENSG00000066468 | FGFR2       | 0.000361 | 2.32E-05 | -1.75119 |
| ENSG00000125848 | FLRT3       | 0.006707 | 0.000826 | -1.01442 |
| ENSG00000114541 | FRMD4B      | 3.23E-18 | 1.09E-20 | -1.29288 |
| ENSG00000265817 | FSBP        | 9.55E-05 | 4.67E-06 | 2.138645 |
| ENSG00000226608 | FTLP3       | 0.003104 | 0.00032  | 1.068521 |
| ENSG00000116717 | GADD45A     | 2.86E-14 | 1.52E-16 | 1.179885 |
| ENSG00000130222 | GADD45G     | 0.002157 | 0.000202 | 1.09236  |
| ENSG00000182870 | GALNT9      | 0.000208 | 1.18E-05 | 1.818153 |
| ENSG00000234741 | GAS5        | 2.10E-17 | 7.70E-20 | 1.19786  |
| ENSG00000130513 | GDF15       | 1.01E-18 | 3.29E-21 | 1.810615 |
| ENSG00000131459 | GFPT2       | 3.32E-13 | 2.27E-15 | 1.776097 |
| ENSG00000155265 | GOLGA7B     | 1.55E-09 | 1.93E-11 | 1.257797 |
| ENSG00000125772 | GPCPD1      | 6.88E-12 | 5.86E-14 | 1.003138 |
| ENSG00000164849 | GPR146      | 0.015105 | 0.002308 | -1.17028 |
| ENSG00000237310 | GS1-124K5.4 | 0.000382 | 2.49E-05 | 1.121429 |
| ENSG00000136732 | GYPC        | 4.78E-13 | 3.37E-15 | 1.113178 |
| ENSG00000130600 | H19         | 0.00011  | 5.52E-06 | -2.07663 |
| ENSG00000051108 | HERPUD1     | 3.32E-14 | 1.89E-16 | 1.01747  |
| ENSG00000144485 | HES6        | 0.000159 | 8.49E-06 | 1.040094 |
| ENSG00000100292 | HMOX1       | 2.10E-40 | 4.36E-44 | 2.622827 |
| ENSG00000164120 | HPGD        | 8.66E-19 | 2.76E-21 | -1.07807 |
| ENSG00000044574 | HSPA5       | 1.06E-10 | 1.07E-12 | 1.060411 |
| ENSG00000003147 | ICA1        | 3.60E-11 | 3.46E-13 | 1.056381 |
| ENSG00000244242 | IFITM10     | 3.35E-05 | 1.44E-06 | 1.292889 |
| ENSG00000172458 | IL17D       | 0.000223 | 1.28E-05 | 1.017891 |
| ENSG00000103522 | IL21R       | 5.98E-07 | 1.43E-08 | 1.514887 |
| ENSG00000110944 | IL23A       | 1.59E-05 | 6.10E-07 | 1.097003 |
| ENSG00000139269 | INHBE       | 2.03E-16 | 8.44E-19 | 1.73033  |
| ENSG00000137825 | ITPKA       | 3.83E-11 | 3.71E-13 | 1.704644 |
| ENSG00000026559 | KCNG1       | 5.85E-07 | 1.39E-08 | 1.667645 |
| ENSG00000135253 | KCP         | 2.25E-06 | 6.37E-08 | 1.308266 |
| ENSG00000049130 | KITLG       | 2.32E-19 | 6.59E-22 | -1.62708 |
| ENSG00000134545 | KLRC1       | 0.000661 | 4.75E-05 | 1.256032 |
| ENSG00000166173 | LARP6       | 2.45E-14 | 1.27E-16 | 1.071563 |
| ENSG00000213658 | LAT         | 1.55E-10 | 1.60E-12 | 1.024837 |
| ENSG00000134333 | LDHA        | 1.86E-19 | 5.16E-22 | -1.07889 |
| ENSG00000214110 | LDHAP4      | 0.000644 | 4.60E-05 | -1.12196 |
| ENSG00000187416 | LHFPL3      | 0.005024 | 0.000577 | -1.76553 |
| ENSG00000225329 | LHFPL3-AS2  | 0.001664 | 0.000145 | -1.52938 |
| ENSG00000185186 | LINC00313   | 0.001396 | 0.000115 | 1.12279  |

|                 |            |          |          |          |
|-----------------|------------|----------|----------|----------|
| ENSG00000225511 | LINC00475  | 0.001115 | 8.77E-05 | 1.060495 |
| ENSG00000274020 | LINC01138  | 1.04E-09 | 1.25E-11 | 1.256711 |
| ENSG00000180861 | LINC01559  | 2.46E-19 | 7.16E-22 | -2.09988 |
| ENSG00000166407 | LMO1       | 7.05E-07 | 1.71E-08 | 2.054636 |
| ENSG00000171236 | LRG1       | 2.37E-08 | 3.80E-10 | -1.13708 |
| ENSG00000125872 | LRRN4      | 1.08E-13 | 6.60E-16 | -1.19527 |
| ENSG00000049323 | LTBP1      | 4.28E-13 | 2.96E-15 | 1.169709 |
| ENSG00000153714 | LURAP1L    | 5.31E-26 | 4.78E-29 | 2.072092 |
| ENSG00000095015 | MAP3K1     | 2.65E-11 | 2.44E-13 | -1.22859 |
| ENSG00000271605 | MILR1      | 1.14E-07 | 2.17E-09 | 1.314614 |
| ENSG00000247095 | MIR210HG   | 1.20E-07 | 2.30E-09 | -1.46393 |
| ENSG00000150051 | MKX        | 3.12E-11 | 2.91E-13 | 1.334642 |
| ENSG00000137673 | MMP7       | 8.06E-10 | 9.43E-12 | -1.88326 |
| ENSG00000178860 | MSC        | 2.32E-08 | 3.70E-10 | 1.378755 |
| ENSG00000185499 | MUC1       | 4.06E-08 | 6.85E-10 | -1.0908  |
| ENSG00000007944 | MYLIP      | 1.02E-12 | 7.60E-15 | -1.11073 |
| ENSG00000198496 | NBR2       | 3.09E-12 | 2.53E-14 | 1.515243 |
| ENSG00000103154 | NECAB2     | 9.90E-07 | 2.49E-08 | 1.765967 |
| ENSG00000111859 | NEDD9      | 6.74E-18 | 2.33E-20 | -1.2169  |
| ENSG00000107954 | NEURL1     | 8.06E-10 | 9.41E-12 | 1.334089 |
| ENSG00000135540 | NHSL1      | 4.49E-09 | 6.00E-11 | 1.003683 |
| ENSG00000012504 | NR1H4      | 0.001066 | 8.32E-05 | -1.56355 |
| ENSG00000205309 | NT5M       | 0.000278 | 1.68E-05 | 1.025857 |
| ENSG00000176046 | NUPR1      | 8.23E-12 | 7.06E-14 | 2.59416  |
| ENSG00000101104 | PABPC1L    | 7.27E-13 | 5.29E-15 | 1.202038 |
| ENSG00000116183 | PAPPA2     | 1.59E-08 | 2.48E-10 | 1.561962 |
| ENSG00000100889 | PCK2       | 1.64E-37 | 5.67E-41 | 1.398512 |
| ENSG00000186642 | PDE2A      | 3.78E-05 | 1.64E-06 | 1.130158 |
| ENSG00000234465 | PINLYP     | 0.00054  | 3.69E-05 | 1.003117 |
| ENSG00000204531 | POU5F1     | 2.05E-07 | 4.17E-09 | -1.15065 |
| ENSG00000143847 | PPFIA4     | 1.14E-08 | 1.67E-10 | -1.64565 |
| ENSG00000087074 | PPP1R15A   | 4.18E-25 | 4.05E-28 | 1.377863 |
| ENSG00000135406 | PRPH       | 3.42E-17 | 1.30E-19 | 2.598638 |
| ENSG00000135069 | PSAT1      | 4.68E-29 | 3.56E-32 | 1.077904 |
| ENSG00000248643 | RBM14-RBM4 | 0.000244 | 1.44E-05 | -1.25104 |
| ENSG00000102032 | RENBP      | 0.010667 | 0.001476 | 1.065179 |
| ENSG00000071242 | RPS6KA2    | 3.01E-12 | 2.43E-14 | 1.351461 |
| ENSG00000166922 | SCG5       | 0.000248 | 1.46E-05 | 1.30884  |
| ENSG00000139410 | SDSL       | 1.19E-10 | 1.22E-12 | 1.152259 |
| ENSG00000170099 | SERPINA6   | 3.35E-07 | 7.50E-09 | -1.22218 |
| ENSG00000130766 | SESN2      | 2.49E-24 | 2.93E-27 | 1.130695 |
| ENSG00000145423 | SFRP2      | 0.000134 | 7.01E-06 | 1.689564 |
| ENSG00000118515 | SGK1       | 2.57E-28 | 2.13E-31 | -1.51328 |

|                 |           |          |          |          |
|-----------------|-----------|----------|----------|----------|
| ENSG00000125089 | SH3TC1    | 5.82E-08 | 1.05E-09 | 1.014884 |
| ENSG00000168679 | SLC16A4   | 1.78E-12 | 1.38E-14 | 1.057185 |
| ENSG00000108932 | SLC16A6   | 5.08E-08 | 8.94E-10 | 1.900172 |
| ENSG00000165449 | SLC16A9   | 1.14E-05 | 4.10E-07 | 1.000722 |
| ENSG00000163393 | SLC22A15  | 3.14E-14 | 1.74E-16 | 1.204282 |
| ENSG00000163581 | SLC2A2    | 3.13E-13 | 2.12E-15 | -1.73594 |
| ENSG00000134955 | SLC37A2   | 1.88E-06 | 5.20E-08 | 1.181495 |
| ENSG00000168003 | SLC3A2    | 4.09E-15 | 1.98E-17 | 1.128674 |
| ENSG00000149150 | SLC43A1   | 2.64E-20 | 5.90E-23 | 1.674306 |
| ENSG00000050438 | SLC4A8    | 3.17E-11 | 2.99E-13 | -1.18146 |
| ENSG00000196517 | SLC6A9    | 1.85E-21 | 3.59E-24 | 1.730616 |
| ENSG00000151012 | SLC7A11   | 8.52E-30 | 5.31E-33 | 1.863244 |
| ENSG00000103257 | SLC7A5    | 6.79E-14 | 4.09E-16 | 1.043127 |
| ENSG00000166750 | SLFN5     | 6.90E-13 | 4.97E-15 | 1.006732 |
| ENSG00000261556 | SMG1P7    | 7.71E-08 | 1.42E-09 | 1.274298 |
| ENSG00000178947 | SMIM10L2A | 1.22E-09 | 1.49E-11 | 1.40811  |
| ENSG00000240204 | SMKR1     | 0.00628  | 0.000762 | 1.174075 |
| ENSG00000120833 | SOCS2     | 1.21E-05 | 4.38E-07 | 1.29662  |
| ENSG00000134548 | SPX       | 2.31E-07 | 4.79E-09 | 1.45914  |
| ENSG00000198203 | SULT1C2   | 6.46E-20 | 1.57E-22 | 1.007914 |
| ENSG00000142765 | SYTL1     | 2.92E-07 | 6.32E-09 | 1.37677  |
| ENSG00000178726 | THBD      | 9.48E-37 | 3.94E-40 | 2.767372 |
| ENSG00000185561 | TLCD2     | 1.23E-12 | 9.33E-15 | 1.152916 |
| ENSG00000145107 | TM4SF19   | 3.04E-14 | 1.64E-16 | 1.084458 |
| ENSG00000136404 | TM6SF1    | 1.54E-14 | 7.80E-17 | 2.407914 |
| ENSG00000127863 | TNFRSF19  | 1.05E-12 | 7.89E-15 | -1.09601 |
| ENSG00000121858 | TNFSF10   | 4.66E-19 | 1.42E-21 | -1.30068 |
| ENSG00000124191 | TOX2      | 1.44E-24 | 1.49E-27 | 1.041135 |
| ENSG00000101255 | TRIB3     | 2.07E-23 | 3.01E-26 | 1.554167 |
| ENSG00000178809 | TRIM73    | 0.015121 | 0.002313 | 1.008155 |
| ENSG00000214049 | UCA1      | 1.25E-06 | 3.24E-08 | -1.57285 |
| ENSG00000111981 | ULBP1     | 8.13E-09 | 1.15E-10 | 1.433423 |
| ENSG00000183696 | UPP1      | 8.59E-31 | 4.16E-34 | 2.212282 |
| ENSG00000134215 | VAV3      | 3.01E-12 | 2.42E-14 | -1.0476  |
| ENSG00000038427 | VCAN      | 7.66E-07 | 1.88E-08 | -1.06419 |
| ENSG00000128564 | VGF       | 1.26E-20 | 2.63E-23 | 1.627162 |
| ENSG00000236404 | VLDLR-AS1 | 8.33E-09 | 1.20E-10 | 1.767913 |
| ENSG00000070540 | WIPI1     | 2.35E-30 | 1.30E-33 | 1.256669 |
| ENSG00000186919 | ZACN      | 0.030058 | 0.005786 | 4.265704 |
| ENSG00000104231 | ZFAND1    | 1.52E-21 | 2.73E-24 | 1.048382 |
| ENSG00000178381 | ZFAND2A   | 1.04E-15 | 4.83E-18 | 1.095001 |
| ENSG00000177410 | ZFAS1     | 5.91E-16 | 2.62E-18 | 1.138104 |
| ENSG00000251003 | ZFPM2-AS1 | 1.01E-08 | 1.48E-10 | 1.067106 |



|                 |           |          |          |          |
|-----------------|-----------|----------|----------|----------|
| ENSG00000224596 | ZMIZ1-AS1 | 1.84E-15 | 8.77E-18 | 1.419135 |
|-----------------|-----------|----------|----------|----------|

**Table S4. Differentially expressed genes in NRK cells after BDE-47 exposure**

| Gene ID             | Gene Name    | Q value     | P value     | Log FC       |
|---------------------|--------------|-------------|-------------|--------------|
| ENSRNOG000000018126 | Abca1        | 1.04E-13    | 4.48E-17    | -1.18801376  |
| ENSRNOG000000027742 | Adamtsl2     | 0.001406925 | 2.34E-05    | -1.108908975 |
| ENSRNOG000000012436 | Adh1         | 0.045827148 | 0.003320127 | 1.359357423  |
| ENSRNOG000000001714 | Atp13a4      | 0.013084433 | 0.000546832 | 1.158973336  |
| ENSRNOG000000018603 | Carns1       | 0.00535769  | 0.000158023 | -1.05053914  |
| ENSRNOG000000015036 | Ctgf         | 0.008164006 | 0.000284963 | -1.118090634 |
| ENSRNOG000000015085 | Dmpk         | 8.93E-12    | 6.15E-15    | -1.201505113 |
| ENSRNOG000000019914 | Fam57b       | 0.018894887 | 0.000897275 | -1.064498634 |
| ENSRNOG000000045636 | Fasn         | 4.33E-18    | 1.12E-21    | -1.119811881 |
| ENSRNOG000000002800 | Gdpd2        | 0.002125594 | 4.32E-05    | -1.349533655 |
| ENSRNOG000000014835 | Il1rl1       | 0.009719165 | 0.000361812 | 1.304648834  |
| ENSRNOG000000006859 | Insig1       | 5.37E-11    | 4.36E-14    | -1.019471233 |
| ENSRNOG000000050240 | LOC100909856 | 0.00104498  | 1.59E-05    | 1.101469674  |
| ENSRNOG000000048982 | LOC100912282 | 0.011679484 | 0.000464901 | -1.802966546 |
| ENSRNOG000000005064 | LOC103694902 | 1.18E-06    | 3.35E-09    | 1.994999133  |
| ENSRNOG000000058500 | LOC103694908 | 0.005094758 | 0.000146217 | 1.423189517  |
| ENSRNOG000000045911 | Mepce        | 0.009255921 | 0.00033903  | 8.79750614   |
| ENSRNOG000000001959 | Mx1          | 0.04525132  | 0.003251049 | -1.038250972 |
| ENSRNOG000000001963 | Mx2          | 0.006543494 | 0.000215428 | -1.177500275 |
| ENSRNOG000000007607 | Nr4a1        | 0.030145565 | 0.001818659 | -1.485012061 |
| ENSRNOG000000003348 | Rasd1        | 0.000556056 | 6.90E-06    | -1.237888683 |
| ENSRNOG000000049913 | Rbm12        | 0.006385037 | 0.000207107 | 8.045602872  |
| ENSRNOG000000011901 | Rrad         | 0.000964255 | 1.44E-05    | -1.062014779 |
| ENSRNOG000000013552 | Scd          | 3.63E-22    | 6.26E-26    | -1.898943385 |
| ENSRNOG000000046005 | Scd2         | 3.60E-12    | 2.17E-15    | -1.310704862 |
| ENSRNOG000000010210 | Slc7a11      | 0.005071297 | 0.000144844 | 1.063420789  |
| ENSRNOG000000003463 | Srebf1       | 1.81E-31    | 1.56E-35    | -1.419819077 |
| ENSRNOG000000005874 | Tle2         | 0.000432315 | 4.63E-06    | -1.110852252 |
| ENSRNOG000000020989 | Tm7sf2       | 2.90E-10    | 3.25E-13    | -1.083553374 |
| ENSRNOG000000052512 | Vps37c       | 2.03E-06    | 6.14E-09    | 7.866679894  |

**Table S5. Differentially expressed genes in NRK cells after HBCD exposure**

| Gene ID             | Gene Name      | Q value  | P value  | Log FC   |
|---------------------|----------------|----------|----------|----------|
| ENSRNOG000000058555 | 7SK            | 0.004253 | 0.000157 | -1.4808  |
| ENSRNOG000000060735 | AABR07053136.1 | 0.019021 | 0.001311 | -1.05129 |
| ENSRNOG00000000967  | Aacs           | 2.22E-13 | 1.91E-16 | -1.07028 |
| ENSRNOG000000019189 | Acat2          | 5.74E-15 | 3.46E-18 | -1.19598 |
| ENSRNOG000000018755 | Acss2          | 2.64E-16 | 9.11E-20 | -1.14304 |
| ENSRNOG000000027742 | Adamtsl2       | 0.001026 | 2.48E-05 | -1.10917 |
| ENSRNOG000000005008 | Angpt4         | 0.000629 | 1.36E-05 | 1.010264 |
| ENSRNOG000000014363 | Arhgef3        | 0.001811 | 5.26E-05 | -1.07026 |
| ENSRNOG000000001714 | Atp13a4        | 0.015984 | 0.001022 | 1.104248 |
| ENSRNOG000000017073 | Car9           | 4.81E-09 | 9.54E-12 | 1.166634 |
| ENSRNOG000000018603 | Carns1         | 0.001931 | 5.74E-05 | -1.12995 |
| ENSRNOG000000006715 | Ccr1           | 0.004696 | 0.000181 | 2.147687 |
| ENSRNOG000000036674 | Cd7            | 0.016851 | 0.001094 | -1.34314 |
| ENSRNOG000000049700 | Cda            | 0.014894 | 0.000918 | 2.309605 |
| ENSRNOG000000014387 | Chac1          | 1.53E-05 | 1.19E-07 | 1.230263 |
| ENSRNOG000000004540 | Clec3b         | 0.000898 | 2.11E-05 | -1.66503 |
| ENSRNOG000000049782 | Csf2ra         | 0.006148 | 0.000263 | -1.06671 |
| ENSRNOG000000046643 | Cyp3a9         | 0.018824 | 0.001296 | 1.084142 |
| ENSRNOG000000007234 | Cyp51          | 2.93E-13 | 2.78E-16 | -1.08104 |
| ENSRNOG000000020776 | Dhcr7          | 1.97E-07 | 7.32E-10 | -1.02226 |
| ENSRNOG000000015736 | Dhrs3          | 3.26E-05 | 3.15E-07 | 1.39321  |
| ENSRNOG000000018247 | Dhx58          | 7.04E-05 | 7.64E-07 | -1.26691 |
| ENSRNOG000000018029 | Doc2g          | 0.030345 | 0.002503 | -1.02722 |
| ENSRNOG000000015880 | Dpep1          | 0.00307  | 0.000103 | -1.31477 |
| ENSRNOG000000006931 | Eepd1          | 0.000113 | 1.32E-06 | -1.15642 |
| ENSRNOG000000043300 | Enho           | 0.000106 | 1.21E-06 | -1.37133 |
| ENSRNOG000000004089 | Enpp2          | 0.038162 | 0.00348  | -1.45214 |
| ENSRNOG000000024688 | Erfe           | 0.00111  | 2.71E-05 | 1.139392 |
| ENSRNOG000000019914 | Fam57b         | 4.99E-05 | 5.12E-07 | -1.69035 |
| ENSRNOG000000043377 | Fdps           | 1.07E-13 | 8.33E-17 | -1.23845 |
| ENSRNOG000000002800 | Gdpd2          | 0.000287 | 4.70E-06 | -1.52088 |
| ENSRNOG000000047697 | Ggt1           | 0.005437 | 0.000223 | 1.026872 |
| ENSRNOG000000038328 | Gjc2           | 0.000874 | 2.03E-05 | -1.17115 |
| ENSRNOG000000022321 | Hapln3         | 0.022358 | 0.00165  | -1.2004  |
| ENSRNOG000000016552 | Hmgcs1         | 1.07E-13 | 8.20E-17 | -1.56974 |
| ENSRNOG000000002826 | Hsd17b7        | 1.64E-12 | 1.84E-15 | -1.44926 |
| ENSRNOG000000016690 | Idi1           | 5.88E-11 | 7.60E-14 | -1.24105 |
| ENSRNOG000000026605 | Ifi27l2b       | 2.26E-05 | 1.81E-07 | 1.057753 |
| ENSRNOG000000011680 | Il16           | 0.006787 | 0.000303 | -1.18333 |
| ENSRNOG000000014835 | Il1rl1         | 4.99E-05 | 5.17E-07 | 1.870023 |
| ENSRNOG000000021217 | Itga10         | 0.000329 | 5.78E-06 | -1.03912 |

|                     |              |          |          |          |
|---------------------|--------------|----------|----------|----------|
| ENSRNOG00000036703  | Itgax        | 4.52E-05 | 4.59E-07 | 1.22292  |
| ENSRNOG00000027601  | Lhfp1        | 0.024057 | 0.001816 | -1.11355 |
| ENSRNOG00000050240  | LOC100909856 | 0.001651 | 4.74E-05 | 1.039389 |
| ENSRNOG00000047977  | LOC100910163 | 0.008683 | 0.000417 | -1.18064 |
| ENSRNOG00000020197  | LOC100911932 | 0.00025  | 3.92E-06 | -1.20056 |
| ENSRNOG00000047158  | LOC103689947 | 3.34E-29 | 2.88E-33 | -2.02271 |
| ENSRNOG00000005064  | LOC103694902 | 1.17E-06 | 5.53E-09 | 1.966432 |
| ENSRNOG000000058500 | LOC103694908 | 0.000119 | 1.45E-06 | 1.808777 |
| ENSRNOG00000046021  | LOC108348172 | 0.039846 | 0.003716 | -1.18297 |
| ENSRNOG000000054549 | Lss          | 1.63E-19 | 4.22E-23 | -1.06333 |
| ENSRNOG00000004610  | Lum          | 3.42E-06 | 1.94E-08 | -1.40207 |
| ENSRNOG00000024620  | Mamdc2       | 0.035725 | 0.003184 | 1.908016 |
| ENSRNOG00000049132  | Map2k3       | 0.041097 | 0.003921 | -1.7194  |
| ENSRNOG00000032832  | Mmp10        | 0.017422 | 0.001143 | 1.05024  |
| ENSRNOG00000008478  | Mmp13        | 0.021463 | 0.001558 | 1.263168 |
| ENSRNOG00000031033  | Mt-nd2       | 0.018037 | 0.001208 | 1.006586 |
| ENSRNOG00000013376  | Mvd          | 1.17E-12 | 1.21E-15 | -1.26268 |
| ENSRNOG00000001959  | Mx1          | 0.023311 | 0.001748 | -1.10711 |
| ENSRNOG00000001963  | Mx2          | 0.000377 | 6.89E-06 | -1.43804 |
| ENSRNOG00000018997  | Myh7b        | 9.98E-06 | 6.71E-08 | -1.29873 |
| ENSRNOG00000002215  | Mylk         | 0.012901 | 0.00073  | -1.10159 |
| ENSRNOG000000057814 | Nsdhl        | 3.50E-15 | 1.81E-18 | -1.17161 |
| ENSRNOG00000003018  | Olfml2b      | 2.15E-06 | 1.21E-08 | -2.08002 |
| ENSRNOG00000011136  | Osr2         | 2.52E-05 | 2.08E-07 | -1.06206 |
| ENSRNOG00000039469  | Pcdhb19      | 0.006138 | 0.000262 | -1.48538 |
| ENSRNOG00000012337  | Pde1c        | 5.51E-05 | 5.79E-07 | -1.88049 |
| ENSRNOG00000018859  | Pik3ip1      | 3.31E-10 | 5.42E-13 | -1.14001 |
| ENSRNOG00000013971  | Psat1        | 3.25E-10 | 5.04E-13 | 1.134908 |
| ENSRNOG00000005277  | Ptpv         | 1.23E-05 | 8.71E-08 | -1.09778 |
| ENSRNOG00000011901  | Rrad         | 0.001307 | 3.44E-05 | -1.02138 |
| ENSRNOG0000001295   | S100b        | 0.009528 | 0.000479 | -1.73204 |
| ENSRNOG00000013552  | Scd          | 6.80E-20 | 1.17E-23 | -1.80472 |
| ENSRNOG00000010210  | Slc7a11      | 0.004557 | 0.000173 | 1.051953 |
| ENSRNOG00000006033  | Spon2        | 1.60E-07 | 5.66E-10 | -1.46022 |
| ENSRNOG00000024028  | Sprr1a       | 0.014773 | 0.000907 | 2.249811 |
| ENSRNOG00000047306  | Stap2        | 2.12E-06 | 1.15E-08 | -1.40874 |
| ENSRNOG00000005874  | Tle2         | 0.00033  | 5.82E-06 | -1.10741 |
| ENSRNOG00000020989  | Tm7sf2       | 3.87E-16 | 1.67E-19 | -1.3524  |
| ENSRNOG00000033734  | Tnnt2        | 0.006659 | 0.000294 | -1.032   |
| ENSRNOG00000007319  | Trib3        | 0.000275 | 4.41E-06 | 1.08373  |
| ENSRNOG00000003587  | Vegfd        | 0.043734 | 0.004312 | -1.14114 |

**Table S6. Differentially expressed genes in NRK cells after TBBPA exposure**

| Gene ID            | Gene Name    | Q value  | P value  | Log FC   |
|--------------------|--------------|----------|----------|----------|
| ENSRNOG00000018126 | Abca1        | 6.51E-12 | 1.59E-15 | -1.20576 |
| ENSRNOG00000008005 | Akna         | 9.39E-05 | 4.37E-07 | 1.043125 |
| ENSRNOG00000009734 | Akr1b10      | 1.19E-16 | 1.03E-20 | 1.479955 |
| ENSRNOG00000007546 | Asns         | 1.82E-07 | 1.73E-10 | 1.035153 |
| ENSRNOG00000050431 | Aspn1        | 0.027305 | 0.000664 | -1.09719 |
| ENSRNOG00000001714 | Atp13a4      | 0.002176 | 1.96E-05 | 1.484226 |
| ENSRNOG00000050419 | Avil         | 0.000938 | 6.71E-06 | 1.291104 |
| ENSRNOG00000033697 | Casp4        | 4.79E-05 | 1.61E-07 | 1.29906  |
| ENSRNOG00000014387 | Chac1        | 4.41E-05 | 1.44E-07 | 1.268179 |
| ENSRNOG00000019851 | Cox6a2       | 0.043825 | 0.001312 | 1.402093 |
| ENSRNOG00000015036 | Ctgf         | 3.63E-05 | 1.13E-07 | -1.7789  |
| ENSRNOG00000015085 | Dmpk         | 2.38E-09 | 8.19E-13 | -1.17659 |
| ENSRNOG00000010805 | Fabp4        | 0.007492 | 9.75E-05 | 1.714904 |
| ENSRNOG00000002800 | Gdpd2        | 0.018035 | 0.000348 | -1.25861 |
| ENSRNOG00000026605 | Ifi2712b     | 6.51E-12 | 1.68E-15 | 1.701851 |
| ENSRNOG00000027433 | LOC100910708 | 4.14E-09 | 1.78E-12 | 1.577989 |
| ENSRNOG00000031045 | LOC100911252 | 0.029677 | 0.000747 | 1.168726 |
| ENSRNOG00000047551 | LOC100911615 | 0.018644 | 0.000367 | -10.0694 |
| ENSRNOG00000048982 | LOC100912282 | 0.000283 | 1.63E-06 | -2.77123 |
| ENSRNOG00000059883 | LOC100912578 | 0.001378 | 1.10E-05 | 1.006203 |
| ENSRNOG00000005064 | LOC103694902 | 0.000257 | 1.46E-06 | 1.661777 |
| ENSRNOG00000008478 | Mmp13        | 7.41E-06 | 1.66E-08 | 2.403855 |
| ENSRNOG00000001963 | Mx2          | 0.042985 | 0.001267 | -1.09432 |
| ENSRNOG00000049695 | Myh2         | 0.014317 | 0.000222 | -1.1604  |
| ENSRNOG00000011136 | Osr2         | 1.78E-05 | 4.75E-08 | -1.18425 |
| ENSRNOG00000019328 | Phgdh        | 5.02E-05 | 1.73E-07 | 1.012059 |
| ENSRNOG00000027331 | Ppef1        | 0.002072 | 1.84E-05 | 1.392698 |
| ENSRNOG00000013971 | Psat1        | 2.72E-07 | 3.05E-10 | 1.025828 |
| ENSRNOG00000015072 | Ptgr1        | 8.60E-09 | 5.19E-12 | 1.181869 |
| ENSRNOG00000003348 | Rasd1        | 5.09E-05 | 1.81E-07 | -1.54785 |
| ENSRNOG00000055564 | RGD1564664   | 0.037655 | 0.001038 | -1.00848 |
| ENSRNOG00000016949 | Slc25a33     | 0.004087 | 4.33E-05 | 1.051265 |
| ENSRNOG00000010210 | Slc7a11      | 6.65E-08 | 5.15E-11 | 1.944944 |
| ENSRNOG00000002218 | Stbd1        | 8.97E-05 | 4.02E-07 | 1.316929 |
| ENSRNOG00000017628 | Tagln        | 0.025161 | 0.000581 | -1.14729 |
| ENSRNOG00000007319 | Trib3        | 1.73E-06 | 3.05E-09 | 1.467291 |
| ENSRNOG00000017854 | Ucp2         | 0.0067   | 8.66E-05 | 1.335377 |
| ENSRNOG00000052512 | Vps37c       | 0.005346 | 6.16E-05 | 5.670153 |

**Table S7. Top 10 BDE 47-enriched gene sets in HK-2 cells according to Gene Set Enrichment Analysis**

| Name                                              | Parent Folder                                                                                                                                                        | # of Entities | # of Measured Entities | Measured Entities                                                                                                  | Median Change | p-value |
|---------------------------------------------------|----------------------------------------------------------------------------------------------------------------------------------------------------------------------|---------------|------------------------|--------------------------------------------------------------------------------------------------------------------|---------------|---------|
| Eicosanoids in Inflammation                       | Inflammatory Mediators of Systemic Reaction; Inflammatory Mediators of Systemic Reaction (Inflammation Pathways); generic; generic                                   | 47            | 8                      | ALOX5;PLA2G4B;PLA2G4C;GGT1;PTGES2;GGT7;PLA2G4A;ALOX5AP                                                             | 1.30          | 0.00    |
| Kynurenine Metabolites in T-Cell Apoptosis        | Aryl Hydrocarbon Receptor Signaling; Aryl Hydrocarbon Receptor Signaling (Receptor Signaling); T-cell Activation and Differentiation; lymphatic system; mitochondria | 26            | 7                      | ACMSD;QPRT;KYAT1;AFMID;AADAT;EIF2AK4;KYNU                                                                          | 1.21          | 0.02    |
| Coagulation Cascade                               | Inflammation Initiation; Inflammation Initiation (Inflammation Pathways); blood; hematological system                                                                | 38            | 8                      | F12;F3;PROS1;VKORC1;COL1A1;TFPI;THBD;PLAT                                                                          | 1.17          | 0.03    |
| Glutamate Release                                 | Neurotransmitter Release Cycles; Neurotransmitter Release Cycles (Nociception Pathways); nerve tissue; nervous system; secretory vesicle                             | 23            | 9                      | SLC38A3;GLS2;SLC1A5;GLUL;SLC38A1;GLS;SLC1A1;SLC7A6;SLC1A3                                                          | -1.16         | 0.01    |
| Vitamin A (Retinol) Metabolism and Visual Cycle   | Cofactors and Vitamins Metabolism; Cofactors and Vitamins Metabolism (Metabolic Pathway); Vitamins Biology; generic; generic                                         | 93            | 18                     | CYP1A1;CYP26A1;RDH5;CYP3A5;CYP26C1;CYP1B1;ALDH1A3;BCO1;DHRS4;RETSAT;DGAT1;DGAT2;LRAT;ADH5;CYP2J2;RDH11;CYP2S1;AOX1 | 1.15          | 0.01    |
| Lipoxins and Resolvins in Inflammation Resolution | Inflammation Resolution; Inflammation Resolution                                                                                                                     | 48            | 9                      | ALOX5;HPGD;LTB4R;CX3CL1;LTA4H;GPR1                                                                                 | 1.15          | 0.00    |

|                                         |                                                                                                     |    |     |                                                                                                                                                                                                                                                                                                                                                                                                                                                                                                                                                                                                                                                                                                                                                                                                                                                                                                                                                                                                                                  |      |      |
|-----------------------------------------|-----------------------------------------------------------------------------------------------------|----|-----|----------------------------------------------------------------------------------------------------------------------------------------------------------------------------------------------------------------------------------------------------------------------------------------------------------------------------------------------------------------------------------------------------------------------------------------------------------------------------------------------------------------------------------------------------------------------------------------------------------------------------------------------------------------------------------------------------------------------------------------------------------------------------------------------------------------------------------------------------------------------------------------------------------------------------------------------------------------------------------------------------------------------------------|------|------|
|                                         | (Inflammation Pathways);<br>generic;<br>generic                                                     |    |     | 32;SELL;TNF;P<br>2RY2                                                                                                                                                                                                                                                                                                                                                                                                                                                                                                                                                                                                                                                                                                                                                                                                                                                                                                                                                                                                            |      |      |
| rRNA<br>Transcription<br>and Processing | RNA<br>Transcription;<br>RNA<br>Transcription<br>(Cell Process);<br>generic;<br>generic;<br>nucleus | 35 | 124 | RPL13A;RPS1<br>9;RPS23;RPS2<br>7A;FBL;RPL34;<br>RPL13;RPS9;R<br>PS3;RPS12;RP<br>S21;RPS14;RP<br>L41;RPL28;RP<br>L21;RPS3A;RP<br>S16;RPL37A;R<br>PL26;RPL36A;<br>RPS10;RPS28;<br>RPS5;RPL37;R<br>PS20;RPS29;R<br>PS6;RPS13;RP<br>L7A;RMRP;RP<br>L27A;GTF3C6;<br>RPL17;RPL18;<br>RPL10A;RPL2<br>2;RPS25;RPS2<br>7;RPS18;FAU;<br>RPL24;RPL31;<br>RPP21;RPS2;<br>RPS24;RPSA;<br>RPL9;RPL3;RP<br>L7;RPLP0;POL<br>R1D;RPL36;P<br>OP5;RPL8;RPL<br>4;RPL35A;RPS<br>17;RPL30;UBA<br>52;RPS4Y1;TT<br>F1;RPL23A;RP<br>S7;RPS15A;RP<br>L15;RPS8;RPL<br>38;RPL14;RPL<br>18A;RPS15;RP<br>L19;RPL10;PO<br>LR3K;MAF1;R<br>PL39;POLR3G<br>L;RPS11;RPL5<br>;RPL11;RPL6;T<br>AF1C;RACK1;<br>RPL27;RPL35;<br>RPL32;BRF1;R<br>PP14;CDK1;R<br>PP38;GTF3C5;<br>POP4;RPL23;P<br>OLR3H;RPS26<br>;RPL29;RPP30<br>;BRF2;POLR1<br>E;POLR1C;TA<br>F1B;DR1;UBTF<br>;POLR3C;POL<br>R3D;POLR3F;<br>GTF3A;POLR3<br>E;TBP;GTF3C2<br>;RB1;CD3EAP;<br>TOP1;RPP40;<br>GTF3C1;TAF1<br>A;GTF3C3;PO<br>LR3A;BDP1;G<br>TF3C4;POLR3<br>G;POLR1B;PO<br>P1;POLR1A;P<br>OLR3B | 1.15 | 0.00 |
| Translation                             | RNA<br>Machinery;                                                                                   | 84 | 146 | RPL13A;RPS1<br>9;RPS23;RPS2                                                                                                                                                                                                                                                                                                                                                                                                                                                                                                                                                                                                                                                                                                                                                                                                                                                                                                                                                                                                      | 1.14 | 0.00 |

|  |                                                                                      |  |  |                                                                                                                                                                                                                                                                                                                                                                                                                                                                                                                                                                                                                                                                                                                                                                                                                                                                                                                                                                                                                                                                                                                                          |  |  |
|--|--------------------------------------------------------------------------------------|--|--|------------------------------------------------------------------------------------------------------------------------------------------------------------------------------------------------------------------------------------------------------------------------------------------------------------------------------------------------------------------------------------------------------------------------------------------------------------------------------------------------------------------------------------------------------------------------------------------------------------------------------------------------------------------------------------------------------------------------------------------------------------------------------------------------------------------------------------------------------------------------------------------------------------------------------------------------------------------------------------------------------------------------------------------------------------------------------------------------------------------------------------------|--|--|
|  | RNA Machinery<br>(Cell Process);<br>endoplasmic<br>reticulum;<br>generic;<br>generic |  |  | 7A;RPL34;RPL<br>13;RPS9;RPS3<br>;RPS12;RPS21<br>;RPS14;RPL41<br>;RPL28;RPL21;<br>RPS3A;RPS16;<br>RPL37A;RPL2<br>6;RPL36A;RPS<br>10;RPS28;RPS<br>5;TPT1;EIF3K;<br>RPL37;RPS20;<br>PTRHD1;RPS2<br>9;RPS6;RPS13<br>;RPL7A;EEF1A<br>1;PTRH1;RPL2<br>7A;EEF1D;RPL<br>17;RPL18;RPL<br>10A;RPL22;RP<br>S25;RPS27;RP<br>S18;FAU;RPL2<br>4;RPL31;RPS2<br>;RPS24;RPSA;<br>EEF1G;RPL9;<br>RPL3;EIF3F;R<br>PL7;RPLP0;EE<br>F1A2;RPL36;Q<br>ARS;RPL8;RP<br>L4;EEF1B2;RP<br>L35A;RPS17;R<br>PL30;UBA52;R<br>PS4Y1;RPL23<br>A;RPS7;RPS15<br>A;RPL15;RPS8<br>;RPL38;EIF1A<br>Y;RPL14;RPL1<br>8A;RPS15;RPL<br>19;RPL10;EIF2<br>S2;RPL39;RPS<br>11;RPL5;RPL1<br>1;EIF1;RPL6;R<br>ACK1;RAMAC;<br>RPS6KA1;RPL<br>27;EIF3L;RPL3<br>5;FARS2;RPL3<br>2;EIF3I;EIF3G;<br>EIF5B;RPS6KB<br>2;EIF3E;EIF3M<br>;RPL23;EIF3H;<br>RPS26;RPL29;<br>DARS;PTRH2;<br>EEF2K;RARS;<br>PABPC1;EIF2S<br>3;SARS;KTN1;<br>EIF3D;AARS;E<br>EF2;EIF3CL;EI<br>F3A;EIF4E;NA<br>RS;FARSA;LA<br>RS2;MRPL58;<br>EIF1AX;EIF3B;<br>GARS;VARS;G<br>SPT1;EIF4A1;<br>EIF3C;CARS;H<br>ARS;LARS;ET<br>F1;EIF2S1;RN<br>GTT;MARS;EIF<br>3J;RNMT;TAR<br>S;EIF4G1;YAR<br>S;IARS;EPRS;<br>KARS;RPS6KB |  |  |
|--|--------------------------------------------------------------------------------------|--|--|------------------------------------------------------------------------------------------------------------------------------------------------------------------------------------------------------------------------------------------------------------------------------------------------------------------------------------------------------------------------------------------------------------------------------------------------------------------------------------------------------------------------------------------------------------------------------------------------------------------------------------------------------------------------------------------------------------------------------------------------------------------------------------------------------------------------------------------------------------------------------------------------------------------------------------------------------------------------------------------------------------------------------------------------------------------------------------------------------------------------------------------|--|--|



|                                                                                        |                                                                                                                                                                           |    |    |                                                                                                                                                                                                                                                                                                                                                    |       |      |
|----------------------------------------------------------------------------------------|---------------------------------------------------------------------------------------------------------------------------------------------------------------------------|----|----|----------------------------------------------------------------------------------------------------------------------------------------------------------------------------------------------------------------------------------------------------------------------------------------------------------------------------------------------------|-------|------|
|                                                                                        |                                                                                                                                                                           |    |    | 1;WARS;MARS<br>2;ABCE1                                                                                                                                                                                                                                                                                                                             |       |      |
| Leukocyte<br>Adhesion to<br>Endothelial Cell                                           | Leukocyte<br>Adhesion;<br>Leukocyte<br>Adhesion<br>(Immunological<br>Pathways);<br>lymphatic<br>system                                                                    | 41 | 15 | CD99;F11R;IC<br>AM2;ICAM3;C<br>D58;GLG1;NE<br>CTIN2;JAM3;S<br>ELL;VCAM1;IC<br>AM1;ITGB1;PV<br>R;ITGA4;ITGB<br>2                                                                                                                                                                                                                                    | -1.14 | 0.04 |
| Fatty Acids<br>Cause<br>Oxidative<br>Stress and<br>Mitochondria<br>Decline in<br>Aging | Organelle<br>Instability<br>Associated with<br>Aging;<br>Organelle<br>Instability<br>Associated with<br>Aging (Aging<br>Biology);<br>generic;<br>generic;<br>mitochondria | 41 | 34 | PLA2G4B;PPA<br>RGC1A;PLA2G<br>4C;UQCRQ;ND<br>UFV1;GPX4;U<br>QCRB;SLC27A<br>1;NQO1;ATP6<br>V1E1;GPX1;AT<br>P5F1D;ATP5P<br>O;UQCRFS1;A<br>TP6V1F;UQCR<br>C1;ATP6V1A;A<br>TP6V1H;NDUF<br>V2;ATP6V0E1;<br>PLA2G12A;AT<br>P6V0A4;PPAR<br>A;ATP6V1D;AT<br>P6AP1;ATP6V<br>1B2;SREBF1;U<br>QCRC2;UCP2;<br>ATP6V0A1;NF<br>E2L2;SLC27A4<br>;PLA2G4A;LDL<br>R | 1.13  | 0.02 |

**Table S8. Top 10 HBKD-enriched gene sets in HK-2 cells according to Gene Set Enrichment Analysis**

| Name                                   | Parent Folder                                                                                                                                                    | # of Entities | # of Measured Entities | Measured Entities                                                                                       | Median Change | p-value  |
|----------------------------------------|------------------------------------------------------------------------------------------------------------------------------------------------------------------|---------------|------------------------|---------------------------------------------------------------------------------------------------------|---------------|----------|
| Eicosanoids in Inflammation            | Inflammatory Mediators of Systemic Reaction; Inflammatory Mediators of Systemic Reaction (Inflammation Pathways); generic; generic                               | 47            | 8                      | PLA2G4B; PLA2G4C; ALOX5; ALOX5AP; GGT1; GGT7; PTGES2; PLA2G4A                                           | 1.335009      | 0.004971 |
| Gastric and Pancreatic Lipase Function | Lipogenesis and Lipolysis; Lipogenesis and Lipolysis (Biological Process); digestive system                                                                      | 19            | 7                      | TGFA; MGLL; HES1; PPARG; SLC27A1; EGF; GATA6                                                            | 1.260558      | 0.02448  |
| CCR1 Expression Targets                | Chemokine GPCRs; GPCR Family; GPCR Family (Nociception Receptors Signaling); nerve tissue; nervous system                                                        | 28            | 8                      | MMP9; TNF; MMP1; VEGFA; ICAM1; STAT3; JAK1; STAT1                                                       | 1.208391      | 0.000748 |
| S-cell: Secretin Production            | Cells of Gastrointestinal Tract Activation; Cells of Gastrointestinal Tract Activation (Eating Behavior and Metabolism Regulation); digestive system; epithelium | 11            | 15                     | ASIC3; MME; PLB1; TMEM37; DPP4; PLAAT3; ABHD3; ASIC1; JMJD7; GRIN2B; TMCO1; CUL5; TRPM4; GRIK1; CHRNA10 | 1.178122      | 0.001394 |
| Coagulation Cascade                    | Inflammation Initiation; Inflammation Initiation (Inflammation Pathways); blood; hematological system                                                            | 38            | 8                      | THBD; F3; VKORC1; PROS1; F12; TFPI; COL1A1; PLAT                                                        | 1.153841      | 0.025038 |
| Glycolysis                             | Eating Behavior and Metabolism Regulation; Eating Behavior and Metabolism Regulation (Biological Process); generic; generic                                      | 36            | 13                     | ENO2; PGK1; HK2; ALDOA; HK1; ENO1; TPI1; GPI; GAPDH; PGAM1; ENO3; PKM; PFKM                             | 1.148631      | 0.003758 |

|                                                                       |                                                                                                                                          |    |    |                                                                                                                                                  |          |          |
|-----------------------------------------------------------------------|------------------------------------------------------------------------------------------------------------------------------------------|----|----|--------------------------------------------------------------------------------------------------------------------------------------------------|----------|----------|
| Insulin Influence on Lipogenesis                                      | Insulin Release and Action;<br>Insulin Release and Action (Eating Behavior and Metabolism Regulation);<br>generic                        | 43 | 25 | APOA2;IRS2;PLPP5;SLC27A1;SLC2A1;ACSL1;GK;SLC2A4;PLPP2;APOC1;APOE;GPAT3;PLPP4;PLPP3;PLPP2;INSR;GK5;DGAT1;PLPP1;AKT1;TBC1D4;DGAT2;GPD1L;PDPK1;IRS1 | 1.139717 | 0.005377 |
| Keep out Signal: LTF Inhibits Neutrophil Recruitment and Inflammation | Efferocytosis;<br>Efferocytosis (Inflammation Resolution);<br>oncogenic;<br>oncogenic                                                    | 18 | 8  | C5AR1;TNF;CSF2;RPS19;CEBPA;REL;CXCL8;IL6                                                                                                         | 1.12399  | 0.00257  |
| Vitamin A (Retinol) Metabolism and Visual Cycle                       | Cofactors and Vitamins Metabolism;<br>Cofactors and Vitamins Metabolism (Metabolic Pathway);<br>Vitamins Biology;<br>generic;<br>generic | 93 | 18 | CYP1A1;CYP26A1;RDH5;CYP26C1;CYP3A5;RETSAT;LRAT;RDH11;BCO1;AOX1;DGAT1;CYP2S1;DHRS4;DGAT2;ADH5;CYP2J2;ALDH1A3;CYP1B1                               | 1.10904  | 0.026023 |
| Find me Signal: Apoptotic Cell Attracts Phagocyte                     | Efferocytosis;<br>Efferocytosis (Inflammation Resolution);<br>oncogenic;<br>oncogenic;<br>secretory vesicle                              | 25 | 16 | ADAM17;RPS19;YARS;ABCA1;S1PR2;CX3CL1;AIMP1;CASP7;ADAM10;S1PR5;P2RY2;ANXA1;PANX1;CXCL8;S1PR1;THBS1                                                | -1.10252 | 0.011763 |

**Table S9. Top 10 TBBPA-enriched gene sets in HK-2 cells according to Gene Set Enrichment Analysis**

| Name                                                                  | Parent Folder                                                                                                                            | # of Entities | # of Measured Entities | Measured Entities                                                          | Median Change | p-value  |
|-----------------------------------------------------------------------|------------------------------------------------------------------------------------------------------------------------------------------|---------------|------------------------|----------------------------------------------------------------------------|---------------|----------|
| Eicosanoids in Inflammation                                           | Inflammatory Mediators of Systemic Reaction; Inflammatory Mediators of Systemic Reaction (Inflammation Pathways); generic; generic       | 47            | 8                      | ALOX5AP;PLA2G4C;PLA2G4B;PLA2G4A;PTGES2;ALOX5;GGT7;GGT1                     | 1.345669      | 0.003006 |
| Keep out Signal: LTF Inhibits Neutrophil Recruitment and Inflammation | Efferocytosis; Efferocytosis (Inflammation Resolution); oncogenic; oncogenic                                                             | 18            | 8                      | C5AR1;CXCL8;IL6;RPS19;CSF2;CEBPA;TNF;REL                                   | 1.340272      | 0.023219 |
| Glycolysis                                                            | Eating Behavior and Metabolism Regulation; Eating Behavior and Metabolism Regulation (Biological Process); generic; generic              | 36            | 13                     | ENO3;PFKM;HK2;GAPDH;HK1;TP11;PKM;ENO1;ENO2;GP1;ALDOA;PGAM1;PGK1            | -1.31609      | 0.001697 |
| Complement Alternative Pathway                                        | Complement Activation; Complement Activation (Biological Process); generic; hematological system; plasma membrane                        | 30            | 6                      | C5AR1;C5;CFP;CFB;CFH;CFI                                                   | 1.289772      | 0.021657 |
| Glutamate Release                                                     | Neurotransmitter Release Cycles; Neurotransmitter Release Cycles (Nociception Pathways); nerve tissue; nervous system; secretory vesicle | 23            | 9                      | SLC38A3;SLC1A5;GLS2;SLC38A1;SLC1A3;SLC1A1;SLC7A6;GLUL;GLS                  | -1.28075      | 0.001096 |
| RHO Signaling (Light Signal Termination and Photoreceptor Recovery)   | Visual Phototransduction; Visual Phototransduction (Biological Process); retina; sensory system                                          | 30            | 12                     | PLCB1;PRKCB;PRKCA;SLC24A1;PLCXD1;RGS9;PLCH1;PDE6B;PLCXD2;PLCE1;PLCB3;PLCB4 | 1.218748      | 0.013279 |
| Chromosome Condensation                                               | Cell Division; Cell Division (Cell Process);                                                                                             | 21            | 20                     | STK4;H3F3B;STAG2;STAG1;NCAPH2;AUR                                          | -1.20377      | 0.02469  |

|                                                     |                                                                                                                                                                                |    |    |                                                                                                                                                                            |          |          |
|-----------------------------------------------------|--------------------------------------------------------------------------------------------------------------------------------------------------------------------------------|----|----|----------------------------------------------------------------------------------------------------------------------------------------------------------------------------|----------|----------|
|                                                     | chromosome;<br>generic;<br>generic;<br>nucleus                                                                                                                                 |    |    | KB;SMC2;PAR<br>P1;AURKA;RA<br>D21;SMC4;NC<br>APG2;CDK1;N<br>CAPG;PLK1;N<br>CAPD3;NCAP<br>D2;ESPL1;TO<br>P2A;NCAPH                                                          |          |          |
| Male Sex<br>Determination                           | Reproductive<br>Biology;<br>Reproductive<br>Biology<br>(Biological<br>Process);<br>reproductive<br>system                                                                      | 38 | 11 | ZFPM2;PTGD<br>S;FOXL2;SP1;<br>SIX4;SIX1;AM<br>H;CITED2;VNN<br>1;CBX2;SOX9                                                                                                  | -1.16044 | 0.043752 |
| GABA Release                                        | Neurotransmitt<br>er Release<br>Cycles;<br>Neurotransmitt<br>er Release<br>Cycles<br>(Nociception<br>Pathways);<br>nerve tissue;<br>nervous<br>system;<br>secretory<br>vesicle | 28 | 23 | GPT2;SLC38A<br>3;STX1B;STX8<br>;STX1A;STX16<br>;CSAD;SLC1A<br>5;STX4;GLS2;<br>SLC38A1;STX<br>18;STX5;STX1<br>2;STX17;STX6;<br>STX10;STX3;S<br>TX7;STX2;SLC<br>7A6;GLUL;GLS | 1.141516 | 0.020208 |
| Macrophage<br>Related Iron<br>Uptake and<br>Release | Monocytes<br>Activation;<br>Monocytes<br>Activation<br>(Myeloid Cells<br>Activation in<br>Inflammation);<br>generic;<br>hematological<br>system;<br>secretory<br>vesicle       | 39 | 15 | HMOX1;CEBP<br>B;FTH1;FTL;IL<br>6;NFKB2;ACO<br>1;CSF2;SLC11<br>A2;HIF1A;TNF;<br>SLC40A1;IREB<br>2;HMOX2;TFR<br>C                                                            | 1.139328 | 0.014949 |

**Table S10. Top 10 BDE 47-enriched gene sets in NRK cells according to Gene Set Enrichment Analysis**

| Name                                  | Parent Folder                                                                                                                                   | # of Entities | # of Measured Entities | Measured Entities                                                                                                                                                                                                            | Median Change | p-value  |
|---------------------------------------|-------------------------------------------------------------------------------------------------------------------------------------------------|---------------|------------------------|------------------------------------------------------------------------------------------------------------------------------------------------------------------------------------------------------------------------------|---------------|----------|
| Estrogen Deficiency in Female Obesity | Aging Related Diseases;<br>Obesity;<br>Obesity (Endocrine and Metabolic Diseases);<br>adipose tissue;<br>connective tissue;<br>endocrine system | 16            | 9                      | PRKAA1;PRKA A2;PPARG;LP L;ACACA;SLC 2A4;FASN;SR EBF1;SCD                                                                                                                                                                     | -1.48779      | 0.001428 |
| Coagulation Cascade                   | Inflammation Initiation;<br>Inflammation Initiation (Inflammation Pathways);<br>blood;<br>hematological system                                  | 38            | 7                      | TFPI;VKORC1; PLAT;COL1A1; PROS1;COL1A 2;F3                                                                                                                                                                                   | -1.32108      | 0.018073 |
| Single-Strand Mismatch                | DNA Repair;<br>DNA Repair (Cell Process);<br>generic;<br>generic;<br>nucleus                                                                    | 19            | 25                     | POLE;EXO1;R FC5;POLD2;R PA2;RFC4;RF C3;LIG1;RFC2; PCNA;FEN1;P OLD1;MSH2;M LH1;RPA1;MS H3;E2F6;POLD 3;MSH6;RFC1; RPA3;MLH3;P URB;PMS1;PO LD4                                                                                  | 1.273773      | 8.36E-07 |
| Chromosome Condensation               | Cell Division;<br>Cell Division (Cell Process);<br>chromosome;<br>generic;<br>generic;<br>nucleus                                               | 21            | 23                     | CASP4;NCAP D3;PLK1;CDK1 ;AURKB;NCAP G;SMC2;TOP2 A;ESPL1;AUR KA;SMC4;NCA PG2;NCAPD2; RAD21;NCAP H2;PARP1;HIS T1H3A;STK4;C ASP1;STAG1; STAG2;HIST1 H3E;HIST1H3 H                                                               | 1.270261      | 0.001954 |
| Protein Nuclear Import and Export     | Proteins Turnover;<br>Proteins Turnover (Cell Process);<br>generic;<br>generic;<br>nucleus                                                      | 26            | 37                     | NUP43;NUP85 ;NDC1;NXT1;N UP205;NUTF2; RANBP1;NUP3 5;KPNA2;NUP 153;NUP93;CS E1L;NUP58;N UP54;RAN;KP NA1;POM121; RCC1;NUP155 ;NUP50;KPNB 1;NUP133;GLE 1;NUP37;NUP 98;RANGAP1; AHCTF1;XPO1 ;XPO4;TNPO1; NUP42;RAE1; XPO6;XPO7;X | 1.218144      | 4.03E-07 |

|                                                                  |                                                                                                                                                         |    |    |                                                                                                                                                                                                                   |          |          |
|------------------------------------------------------------------|---------------------------------------------------------------------------------------------------------------------------------------------------------|----|----|-------------------------------------------------------------------------------------------------------------------------------------------------------------------------------------------------------------------|----------|----------|
|                                                                  |                                                                                                                                                         |    |    | PO5;TNPO3;NXF1                                                                                                                                                                                                    |          |          |
| Complement Classical Pathway                                     | Complement Activation; Complement Activation (Biological Process); generic; hematological system; plasma membrane                                       | 28 | 5  | C1QBP;C5AR2;C2;C1R;C1S                                                                                                                                                                                            | -1.19024 | 0.028552 |
| Extracellular Matrix Turnover                                    | Cellular Contacts; Cellular Contacts (Cell Process); generic; generic; plasma membrane                                                                  | 36 | 29 | MMP13;DYM;LRP1;MMP16;FN1;MMP2;COL6A3;COL6A2;ECM1;MMP19;TIMP1;COL6A1;MMP14;TIMP2;COL5A3;MMP10;RECK;COL5A2;MMP28;COL1A1;COL1A2;COL5A1;ADAMTS1;THBS2;COL4A2;MMP24;MMP15;COL4A1;MMP11                                 | -1.18661 | 0.001458 |
| Lipids Enhance Apoptotic Cell Engulfment and Reduce Inflammation | Efferocytosis; Efferocytosis (Inflammation Resolution); oncogenic; oncogenic; secretory vesicle                                                         | 36 | 17 | C1QBP;RARA;RXRA;NR1H2;RXRB;RARG;MFGE8;CD14;PPARG;NFKB2;IL6;TGM2;PPAR;MERTK;ABCA1;SREBF1;NR4A1                                                                                                                     | -1.17878 | 0.000314 |
| Insulin Secretion                                                | Insulin Release and Action; Insulin Release and Action (Eating Behavior and Metabolism Regulation); Pancreatic Beta-cells in Diabetes; endocrine system | 38 | 11 | SLC2A1;CREB1;MTPN;PLCB1;PLCB3;ITPR1;PLCB4;SYTL4;ACLY;GIP;PLCL1                                                                                                                                                    | -1.17784 | 0.044514 |
| Double Strand DNA Homologous Repair                              | DNA Repair; DNA Repair (Cell Process); generic; generic; nucleus                                                                                        | 30 | 37 | POLE;POLE2;XRCC3;BRCA2;BRCA1;BARBD1;POLD2;RAD51;XRCC2;POLA1;LIG1;H2AFX;ATM;POLD1;ABRAXAS1;MDC1;RBBP8;POLH;POLE3;UBE2N;REV3L;MRE11;RAD50;SMC1A;BRCC3;POLK;POLB;LIG3;NBN;UIMC1;POLI;ATRX;POLE4;POLM;RAD52;POLL;LIG4 | 1.175153 | 3.64E-05 |

**Table S11. Top 10 HBCD-enriched gene sets in NRK cells according to Gene Set Enrichment Analysis**

| Name                                          | Parent Folder                                                                                                                                     | # of Entities | # of Measured Entities | Measured Entities                                                                                                                           | Median Change | p-value  |
|-----------------------------------------------|---------------------------------------------------------------------------------------------------------------------------------------------------|---------------|------------------------|---------------------------------------------------------------------------------------------------------------------------------------------|---------------|----------|
| Estrogen Deficiency in Female Obesity         | Aging Related Diseases;<br>Obesity;<br>Obesity (Endocrine and Metabolic Diseases);<br>adipose tissue;<br>connective tissue;<br>endocrine system   | 16            | 9                      | PRKAA2;PRKA A1;PPARG;AC ACA;SREBF1; SLC2A4;FASN; LPL;SCD                                                                                    | -1.4985       | 7.93E-05 |
| Complement Cascade Activation by Pentraxins   | Systemic Effects in Inflammation;<br>Systemic Effects in Inflammation (Inflammation Pathways);<br>blood;<br>hematological system                  | 29            | 5                      | FCGR2A;SNR NP70;C2;CFH; C1S                                                                                                                 | -1.29582      | 0.003759 |
| Complement Classical Pathway                  | Complement Activation;<br>Complement Activation (Biological Process);<br>generic;<br>hematological system; plasma membrane                        | 28            | 5                      | C1QBP;C5AR2 ;C1R;C2;C1S                                                                                                                     | -1.26217      | 0.029818 |
| Gastric and Pancreatic Lipase Function        | Lipogenesis and Lipolysis;<br>Lipogenesis and Lipolysis (Biological Process);<br>digestive system                                                 | 19            | 6                      | TGFA;GATA6; PPARG;SLC27 A1;HES1;GIP                                                                                                         | -1.24188      | 0.0082   |
| Single-Strand Mismatch                        | DNA Repair;<br>DNA Repair (Cell Process);<br>generic;<br>generic;<br>nucleus                                                                      | 19            | 25                     | POLE;EXO1;P OLD2;RFC3;R PA2;RFC5;LIG 1;FEN1;MLH1; POLD1;RFC4; RFC2;POLD3; MSH3;MSH6;R PA1;PCNA;MS H2;E2F6;PUR B;RFC1;MLH3; RPA3;PMS1;P OLD4 | 1.225979      | 0.000223 |
| Complement Activation in Macular Degeneration | Age-Related Macular Degeneration;<br>Age-Related Macular Degeneration (Ophthalmolog y/Eye Diseases);<br>Aging Related Diseases;<br>sensory system | 45            | 11                     | CD55;C1QBP; HTRA1;MASP2 ;CD46;CLU;CF P;C1R;C2;CFH ;C1S                                                                                      | -1.22363      | 0.006652 |



|                               |                                                                                                                              |    |    |                                                                                                                                                                                                  |          |          |
|-------------------------------|------------------------------------------------------------------------------------------------------------------------------|----|----|--------------------------------------------------------------------------------------------------------------------------------------------------------------------------------------------------|----------|----------|
| Coagulation Cascade           | Inflammation Initiation; Inflammation Initiation (Inflammation Pathways); blood; hematological system                        | 38 | 7  | TFPI;VKORC1; COL1A1;COL1A2;F3;PLAT;P ROS1                                                                                                                                                        | -1.22245 | 0.037605 |
| Glycolysis                    | Eating Behavior and Metabolism Regulation; Eating Behavior and Metabolism Regulation (Biological Process); generic; generic  | 36 | 15 | HK3;PGK1;EN O1;GAPDH;PG AM1;PKM;TPI1 ;HK2;ENO2;AL DOA;GPI;ENO 3;HK1;PGAM2; PFKM                                                                                                                  | 1.218215 | 0.0089   |
| Extracellular Matrix Turnover | Cellular Contacts; Cellular Contacts (Cell Process); generic; generic; plasma membrane                                       | 36 | 29 | MMP13;MMP1 0;DYM;LRP1;M MP16;COL6A3 ;MMP19;RECK ;COL6A2;FN1; TIMP1;COL5A 2;MMP14;COL 1A1;COL5A1;E CM1;COL1A2; MMP2;COL6A 1;COL4A2;TIM P2;THBS2;CO L5A3;ADAMTS 1;COL4A1;MM P24;MMP28;M MP15;MMP11 | -1.21317 | 2.34E-05 |
| Vitamin K Metabolism          | Cofactors and Vitamins Metabolism; Cofactors and Vitamins Metabolism (Metabolic Pathway); Vitamins Biology; generic; generic | 36 | 11 | PRRG4;PRRG 1;VKORC1L1; GGCX;VKORC 1;PRRG2;F3;N QO1;MGP;PR OS1;GAS6                                                                                                                               | -1.20217 | 0.031923 |

**Table S12. Top 10 TBBPA-enriched gene sets in NRK cells according to Gene Set Enrichment Analysis**

| Name                                   | Parent Folder                                                                                                                                   | # of Entities | # of Measured Entities | Measured Entities                                                                                                                                                                 | Median Change | p-value  |
|----------------------------------------|-------------------------------------------------------------------------------------------------------------------------------------------------|---------------|------------------------|-----------------------------------------------------------------------------------------------------------------------------------------------------------------------------------|---------------|----------|
| Estrogen Deficiency in Female Obesity  | Aging Related Diseases;<br>Obesity;<br>Obesity (Endocrine and Metabolic Diseases);<br>adipose tissue;<br>connective tissue;<br>endocrine system | 16            | 9                      | PPARG;PRKA A1;PRKAA2;SREBF1;ACACA;FASN;LPL;SLC2A4;SCD                                                                                                                             | -1.31323      | 0.001513 |
| Extracellular Matrix Turnover          | Cellular Contacts;<br>Cellular Contacts (Cell Process);<br>generic;<br>generic;<br>plasma membrane                                              | 36            | 29                     | MMP13;MMP10;DYM;MMP19;MMP16;ECM1;ADAMTS1;MMP14;COL6A2;COL5A3;TIMP1;FN1;LRP1;COL6A1;MMP28;MMP24;COL6A3;TIMP2;MMP2;RECK;COL5A2;MMP15;COL4A2;COL1A2;COL5A1;COL1A1;COL4A1;THBS2;MMP11 | -1.25828      | 2.04E-07 |
| Coagulation Cascade                    | Inflammation Initiation;<br>Inflammation Initiation (Inflammation Pathways);<br>blood;<br>hematological system                                  | 38            | 7                      | TFPI;VKORC1;PLAT;PROS1;F3;COL1A2;COL1A1                                                                                                                                           | -1.22793      | 0.025671 |
| Single-Strand Mismatch                 | DNA Repair;<br>DNA Repair (Cell Process);<br>generic;<br>generic;<br>nucleus                                                                    | 19            | 25                     | EXO1;RPA2;RFC5;POLD2;RFC4;RFC3;RFC2;PCNA;POL E;MLH3;RPA3;FEN1;LIG1;POLD3;MLH1;E2F6;MSH3;POLD1;MSH2;MSH6;RPA1;PMS1;RFC1;POLD4;P URB                                                | 1.171065      | 0.007218 |
| Vasodilation Activation                | Vascular System Response;<br>Vascular System Response (Inflammation Pathways);<br>cardiovascular system                                         | 28            | 14                     | ADCY8;ADCY3;PPP1CB;PRKACA;ADCY7;CALML4;PRKACB;ADCY9;CACNA1C;ADCY6;m_Calm1;PTGIR;ADRB2;MYLK                                                                                        | -1.16983      | 0.000138 |
| GRM1/5 (Postsynaptic) - > Ion Channels | Glutamate Receptors;<br>Glutamate Receptors;<br>Glutamate Receptors                                                                             | 35            | 18                     | ADCY8;ADCY3;PLCB3;PLCB1;CACNA1B;PRKACA;ADCY7;GNAQ;PRKACB;ADCY9;ADC                                                                                                                | -1.16983      | 0.000246 |

|             |                                                                                      |    |     |                                                                                                                                                                                                                                                                                                                                                                                                                                                                                                                                                                                                                                                                                                                                                                                  |          |          |
|-------------|--------------------------------------------------------------------------------------|----|-----|----------------------------------------------------------------------------------------------------------------------------------------------------------------------------------------------------------------------------------------------------------------------------------------------------------------------------------------------------------------------------------------------------------------------------------------------------------------------------------------------------------------------------------------------------------------------------------------------------------------------------------------------------------------------------------------------------------------------------------------------------------------------------------|----------|----------|
|             | (Ligand Gated Ion Channels); nerve tissue; nervous system                            |    |     | Y6;CACNA1A;PRKCE;TRPV2;PLCB4;ITPR1;PLCL1;KCNJ9                                                                                                                                                                                                                                                                                                                                                                                                                                                                                                                                                                                                                                                                                                                                   |          |          |
| Translation | RNA Machinery; RNA Machinery (Cell Process); endoplasmic reticulum; generic; generic | 84 | 129 | WARS;EPRS;RPS27;RPL36;YARS;CARS;RPL31;RPL17;SARS;NARS;GARS;RPL35A;RPS6KA1;AARS;RPL27A;MARS;RPS19;RPL24;RPS8;IARS;EIF2S2;RPS11;RPL35;RPL39;RPL37;RPS15A;RPS24;RPS25;EIF4A1;TARS;RPL30;RPS7;VARS;RPS18;RPL15;LARS;EIF2S1;ABCE1;PTRHD1;m_Rps3a1;EIF3C;FARS2;RPL7A;MRPL58;RPL13;RPS27A;RPS6;RPL23A;RPL27;RPS3A;RPL11;PTRH2;RPS16;RPS21;EEF1B2;EIF3D;RPS10;EIF3G;RPL10A;RPL28;RACK1;RPL14;EIF3H;RAMAC;RPS3;EIF4E;RPL26;RPL4;RPS6KB1;RPL23;RPL10;EIF1AX;RPL5;RPS14;RPL22;RPL6;FAU;RNMT;TPT1;EIF3J;RPS5;RPL19;RPL18A;ETF1;EEF1D;RPL18;RPL37A;RPL7;RPLP0;RARS;RPSA;RPS23;RPS4Y1;RPL9;FARSA;EIF1;KARS;DARS;RPS15;GSPT1;MARS2;EIF3B;RPS12;RPL21;PTRH1;RPS29;EEF1G;EIF3K;RPL13A;RPS6KB2;EIF1AY;EIF4G1;RPS28;PABPC1;EIF3M;RPL3;EIF2S3;EEF1A1;EIF3A;EIF3F;RPS2;HARS;EEF2K;EEF2;EIF3E;LARS2;RP | 1.166574 | 5.47E-11 |

|                             |                                                                                                                                                         |    |    |                                                                                                              |          |          |
|-----------------------------|---------------------------------------------------------------------------------------------------------------------------------------------------------|----|----|--------------------------------------------------------------------------------------------------------------|----------|----------|
|                             |                                                                                                                                                         |    |    | S20;EIF5B;RNGTT                                                                                              |          |          |
| HRH1/2 -> Vascular Motility | Amine GPCRs; Histamine Receptors/Amine GPCRs; Histamine Receptors/Amine GPCRs (GPCR Family); cardiovascular system; cytoskeleton                        | 28 | 17 | ADCY8;ADCY3;PLCB3;PPP1CB;CACNA1B;PRKACA;ADCY7;CALML4;GNAQ;PRKACB;ADCY9;CACNA1C;NOS3;ADCY6;m_Calm1;ITPR1;MYLK | -1.15566 | 0.001385 |
| TACR1 -> Membrane Transport | Peptide GPCRs; Tachykinin Receptor/Peptide GPCRs; Tachykinin Receptor/Peptide GPCRs (GPCR Family); generic; generic; plasma membrane                    | 20 | 15 | ADCY8;ADCY3;PRKCA;PLCB3;PLCB1;PRKACA;ADCY7;GNAQ;PRKACB;ADCY9;ADCY6;PLCB4;ITPR1;PLCL1;TACR1                   | -1.15566 | 0.003407 |
| PTGFR -> Vasoconstriction   | Lipid Like GPCRs; Prostaglandin Receptors/Lipid Like GPCRs; Prostaglandin Receptors/Lipid Like GPCRs (GPCR Family); cardiovascular system; cytoskeleton | 15 | 9  | PRKCA;PLCB1;PPP1CB;CALML4;GNAQ;m_Calm1;PTGFR;ITPR1;MYLK                                                      | -1.15566 | 0.036924 |
